# Supplementary material
Source: HighWire-hosted journal article supplement (https://www.jneurosci.org/highwire/filestream/600797/field_highwire_adjunct_files/0/Supplemental_Material.pdf)

## **SUPPLEMENTARY FIGURE LEGENDS**

**Supplementary figure 1 –Changes in strength, potency and FR expressed as percentages**

**Supplementary figure 2 – Different outcomes in divergent and convergent triplets**

**Supplementary figure 3 – Changes in latency**

**Supplementary figure 4 – Number of release sites**

**Supplementary figure 1 –Changes in strength, potency and FR expressed as percentages**

(A-C) Histograms showing the change in strength (A), potency (B) and failure rate (C) of all connections (n=42) after pairing expressed as percentage of baseline values.

**Supplementary figure 2 – Different outcomes in divergent and convergent triplets**

(A) The normalized  $((X_A - X_B)/(X_A + X_B))$  difference in  $\Delta_N$  strength (upper panel),  $\Delta_N$  potency (middle panel) and  $\Delta_N$  failure rate (lower panel), of the two recorded connections for each divergent triplet (n=4; left; large grey points) were compared to differences in strength, potency and failure rate values for pairs of connections randomly extracted from all recorded connections (n=42). 100 such sets are shown (right); black points indicate sets not significantly different to the actual triplet data, red points indicate the rare sets that are significantly different ( $p < 0.05$ ) from the actual triplet data (See Methods for details).

(B) – Same as (A), but for convergent triplets (n=3).

**Supplementary figure 3 – Changes in latency**

(A-B) Correlations between changes in latency ( $\text{latency}_{\text{post}} - \text{latency}_{\text{pre}}$ ) and normalized changes in strength (A;  $R^2 = 0.25$ ,  $p < 0.01$ ) and failure rate (B;  $R^2 = 0.18$ ,  $p < 0.01$ ).

(C) Average pre- (black) and post-pairing (red) traces from example connections that underwent LTD and a shift towards higher latency (top) and LTP and a shift towards lower latency (bottom). (D) Barplots showing the change in latency for each plasticity

group (LTP/NC/LTD shown in red/grey/blue). Asterisks indicate significant differences ( $p < 0.01$ , Wilcoxon test).

**Supplementary figure 4 – Number of release sites**

(A) Scatterplot showing the relationship of initial N to normalized strength changes.

(B) Difference in absolute strength change in response to pairing between connections mediated by a low ( $< 5$ ) and high ( $\geq 5$ ) number of release sites ( $p < 0.001$ , Wilcoxon test).

(C) Lack of correlation between normalized changes in strength and N ( $R^2 = 0.04$ ,  $p = 0.11$ ).

(D) Averaged normalized changes in N for connections grouped by plasticity outcome.  $\Delta_N N$  was not significantly different between groups (all  $p > 0.05$ , Wilcoxon test).

(E) Lack of correlation between initial failure rate and  $\Delta_N N$  ( $R^2 = -0.04$ ,  $p = 0.92$ ).

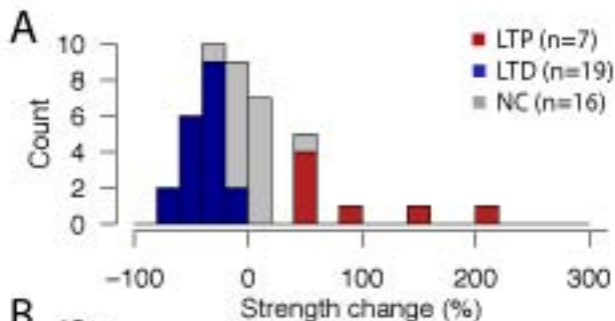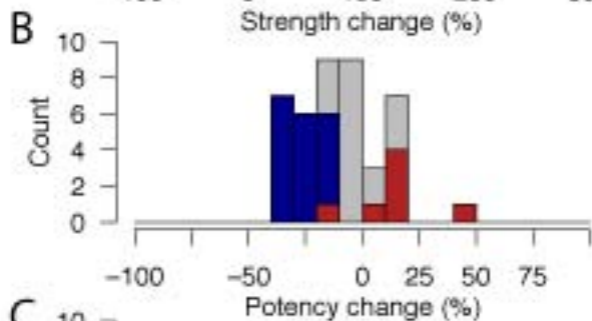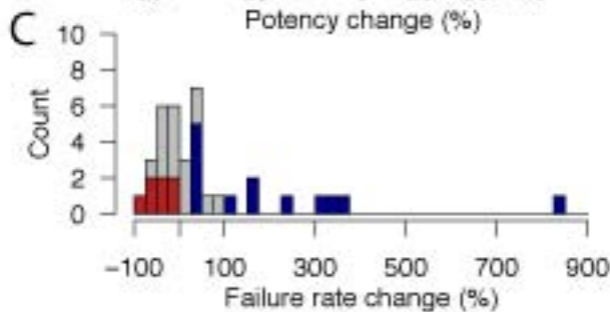

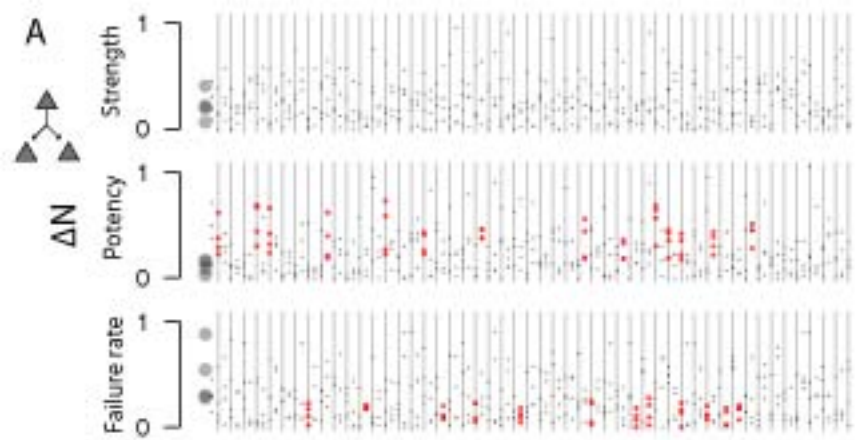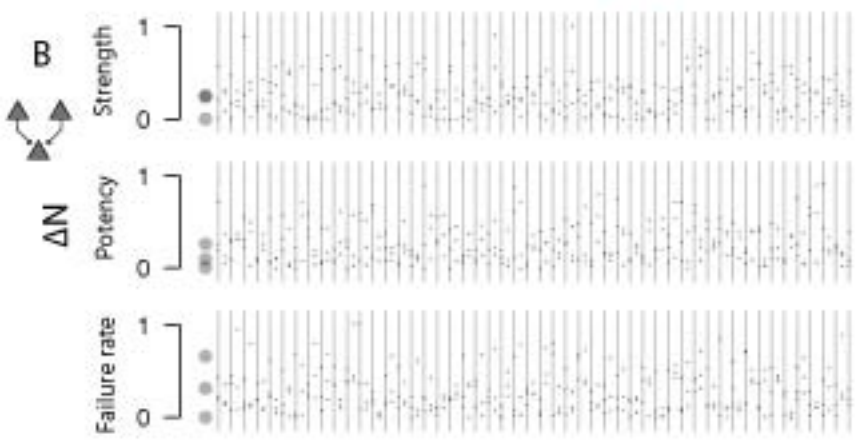

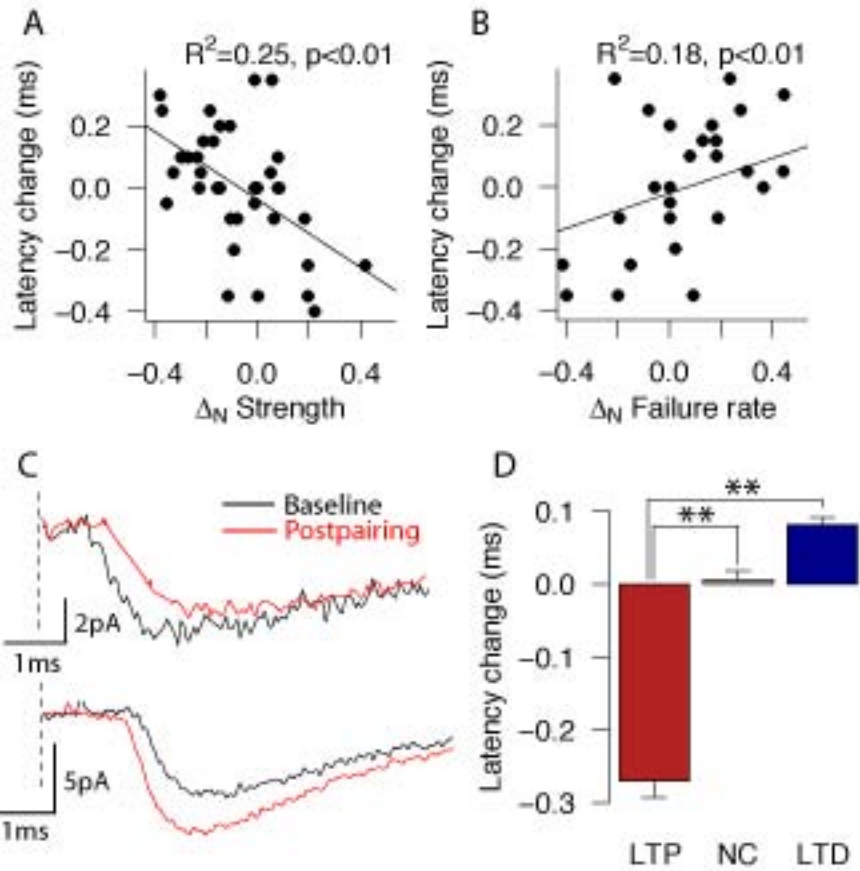

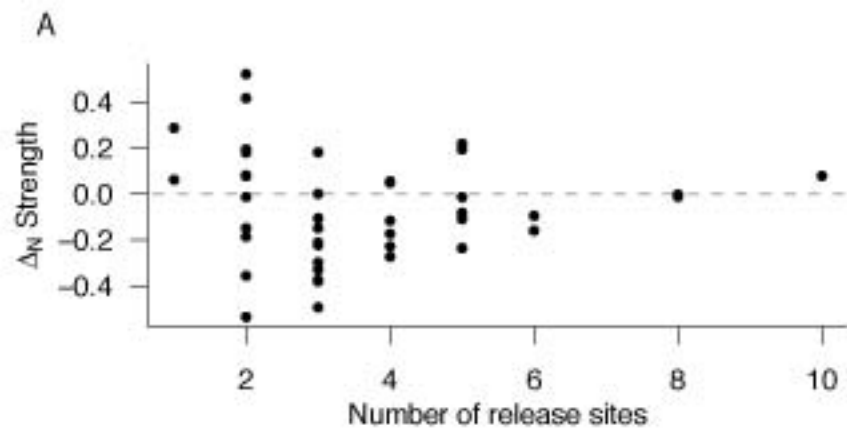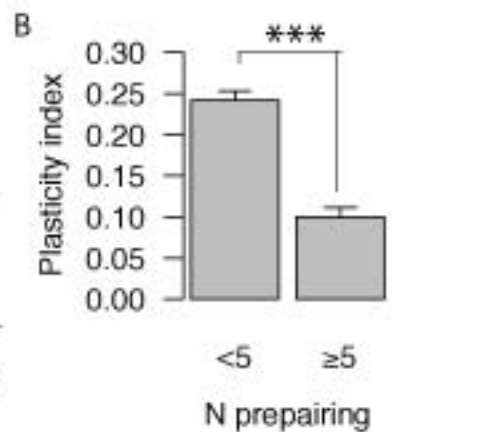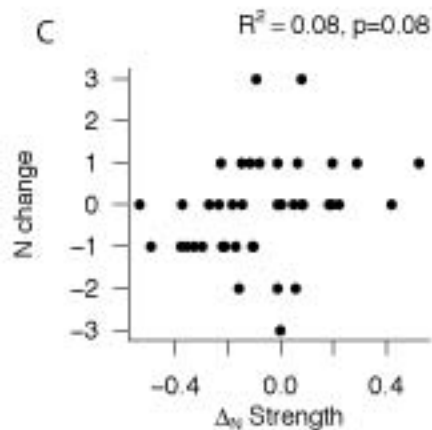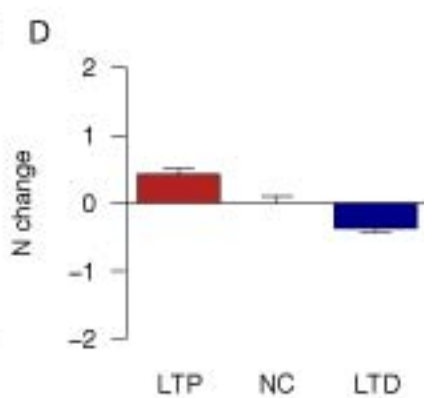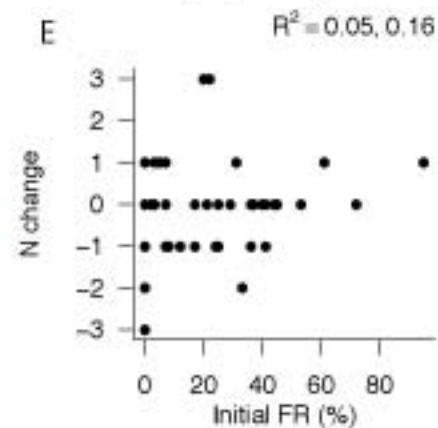

Supplement: Supplemental_Material.pdf [file Supplemental_Material.pdf]
